# Supplementary material for: HeT-A_pi1, a piRNA Target Sequence in the Drosophila Telomeric Retrotransposon HeT-A, Is Extremely Conserved across Copies and Species
Source: PLOS journal article supplement (doi:10.1371/journal.pone.0037405), 2012-05-21
Supplement: S2 (10.1371/journal.pone.0037405.s002) [file journal.pone.0037405.s002]

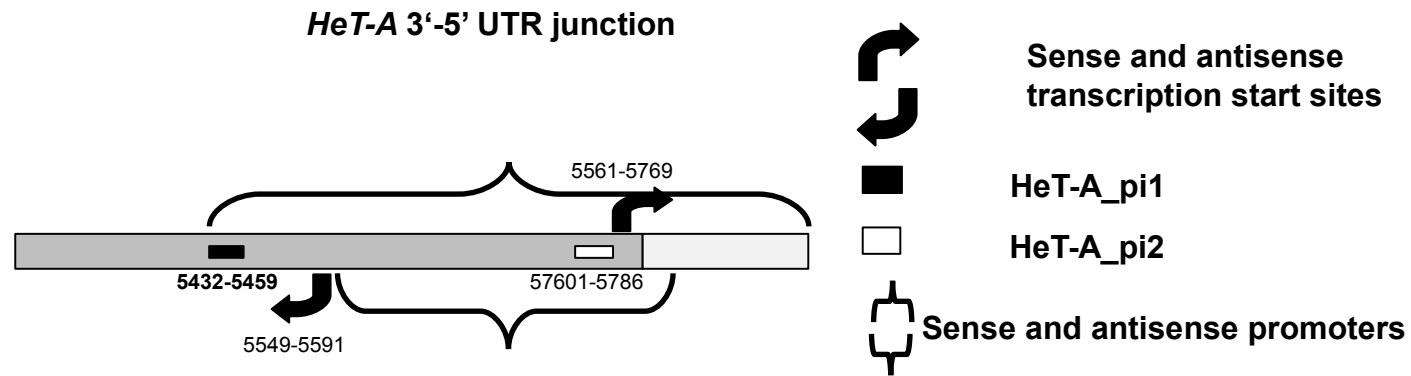

**Figure S2. Position of HeT-A\_pi1 relative to the sense and antisense promoters and start sites.** Positions in accordance with the sequence from clone HeT-A{}4R6262 are shown.
