# Supplementary material for: HeT-A_pi1, a piRNA Target Sequence in the Drosophila Telomeric Retrotransposon HeT-A, Is Extremely Conserved across Copies and Species
Source: PLoS One. 2012 May 21;7(5):e37405. doi: 10.1371/journal.pone.0037405 (PMC3357415; doi:10.1371/journal.pone.0037405)
Supplement: Table S2 — Blast hits along the functional domains of the HeT-A copy HeT-A{}6268. (XLS) [file pone.0037405.s014.xls]

## Sheet: Table_S2
Table S2. Blast hits along the functional domains of the HeT-A copy HeT-A{}6268 (5’UTR, gag coding region and 3’UTR) against the databases of annotated HeT-A elements from eleven sequenced Drosophila species .
species	#hits 5’UTR	#hits GAG	#hits 3’UTR	# of annotated HeT-A sequences in db
dsim	0	31	23	201
dsec	0	122	109	406
dmel	52	189	365	548
dyak	0	0	59	231
dere	0	0	0	149
dana	0	0	0	38
dpse	0	0	0	5
dper	0	0	0	150
dmoj	0	0	0	13
dvir	0	0	0	16
dgri	0	0	0	17
